# Supplementary material
Source: publisher figshare collection journal article supplement (https://rs.figshare.com/ndownloader/files/14862368)
Supplement: Supplementary file 1 [file 14862368]

**Table S2.**

| Population/Clone | **PHO84** |  |  | **TRK1** |
| --- | --- | --- | --- | --- |
| pop C12 | Ser67Cys (N) |  |  | Phe451Leu (N) |
| pop D01 | Leu357Phe (D) |  |  | Glu1011fs (D) |
| pop E03 | Leu387Leu (N) |  |  | wt |
| clone H03a | Val144Ile (N) |  |  | wt |
| clone H03b | Val144Ile (N) |  |  | Asn245Asp (N) |
|  | **IRA2** |  |  | **SYP1** |
| clone A03b | Phe2557fs (D) |  |  | Gln180Glu (N) |
| pop B01 | Glu2774* (D) |  |  | wt |
| pop C11 | Ile1463fs (D) |  |  | Gly300fs (D) |
| pop D01 | wt |  |  | Ile753Ile (N) |
| clone D10a | Glu2440* (D) |  |  | wt |
| clone D12a | Ser1292Phe (D) |  |  | wt |
| clone D12b | Ser1292Phe (D) |  |  | Val126Leu (N) |
| pop H03 | Lys2651Asn (N) |  |  | wt |
|  | **CYM1** |  |  | **LTE1** |
| pop B03 | wt |  |  | Ser185* (D) |
| pop C02 | wt |  |  | Lys1138* (D) |
| pop C03 | wt |  |  | Ala1368fs, Ala748Ser (D) |
| pop C11 | His700Asp (N) |  |  | Ala748Val (N) |
| pop D12 | wt |  |  | Glu653* (D) |
| pop F02 | Asp145Val (D) |  |  | Glu865* (D) |
| pop F03 | wt |  |  | Met1062Ile, Gln916Lys (D) |
| clone F10a | wt |  |  | Trp380* (D) |
| clone F10b | Leu274Ser (N) |  |  | Trp380* (D) |
| clone G02a | wt |  |  | Trp380* (D) |
| clone G12b | wt |  |  | Trp1403* (D) |
|  | **BCK2** | **WHI2** $ | | **CWC22** |
| pop C12 | Asp452His(N) | Thr283fs(D) | | wt |
| pop D03 | wt | Ala338* (D) | | wt |
| pop E03 | Asn217fs (D) | Leu76fs(D) | | wt |
| pop E11 | wt | Gln81* (D) | | Val60Val (N) |
| clone E12a | wt | Gln181*(D) | | Wt |
| clone E12b | wt | Gln181*(D) | | wt |
| clone F11a | wt | Gln29*(D) | | Leu526Phe (N) |
| clone F11b | wt | Gln29*(D) | | wt |
| pop G01 | wt | Glu168Gly (D) | | wt |
| clone G02a | Arg370*, Pro57Leu (D) | Ser72*(D) | | wt |
| clone G02b | Arg370* (D) | Ser72*(D) | | wt |
| pop G11 | wt | Asn275fs(D) | | Cys245Gly (N) |
| clone H11a | wt | Leu76fs, Ala310Pro (D) | | Thr183Pro (N) |
| clone H11b | wt | Leu76fs, Ala310Pro (D) | | Thr183Pro (N) |

**Evolved alleles of genes in top 5 putative interactions.**  All mutations to genes in the top 5 significant pairs are listed along with their PROVEAN predicted effect (cutoff = -2.5) ; (N) neutral, (D) deleterious. $*WHI2* putatively interacts with both *CWC22* and *BCK2*.  Mutations are homozygous. Fixed alleles are identified by population and non-fixed alleles are identified by clone. All genotype data published previously in reference (30).
